# Supplementary material for: 3D Hollow Sn@Carbon‐Graphene Hybrid Material as Promising Anode for Lithium‐Ion Batteries
Source: Hindawi journal article supplement (doi:10.1155/2014/974285), 2014-01-01
Supplement: f1 [file 974285.f1.doc]

**Electronic Supplementary Information**

3D hollow Sn@carbon-graphene hybrid material as promising anode for lithium-ion batteries

Xiaoyu Zheng, 1 Wei Lv, *2 Yan-Bing He,2 Chen Zhang,1 Wei Wei,1 Ying Tao,1 Baohua Li,2 and Quan-Hong Yang1,2

1 School of Chemical Engineering and Technology, Tianjin University, Tianjin 300072 , China

2 Engineering Laboratory for Functionalized Carbon Materials, Graduate School at Shenzhen, Tsinghua University, Shenzhen 518055, China

*Correspondence should be addressed to Wei Lv; lv.wei@sz.tsinghua.edu.cn

**1. Results**


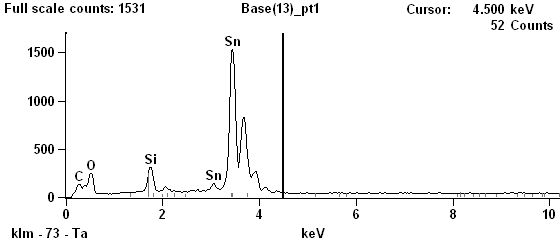


**Fig. S1** EDX spectrum of HSCG.

**Fig. S2** N2 adsorption isotherm of HSCG.

**Fig. S3** TGA profiles of HSCG.

**2. The capacitive performance of HSCG as compared to the reference samples**

**Fig. S4** The comparison of the reversible capacity of reported Sn-C hybrids and HSCG after 20 cycles (a) and 50 cycles (b) .

**References**

[1] L. Kezhi, W. Xiaolin, X. Yanhui and L. Guohua, "Nano-sized Sn/MWNTs and MWNTs served as the anode of lithium ion battery,"*J. Wuhan Univ. Technol.-Mat. Sci. Edit.*, vol. 21, no. 4, pp:60-63, 2006.

[2] H. Zhao, C. Jiang, X. He, J. Ren and C. Wan, "Advanced structures in electrodepo sited tin base anodes for lithium ion batteries,"*Electrochimica Acta*, vol. 52, no. 28, pp:7820-7826, 2007.

[3] A. R. Kamali and D. J. Fray, "TIN-BASED MATERIALS AS ADVANCED ANODE MATERIALS FOR LITHIUM ION BATTERIES: A REVIEW,"*Reviews on Advanced Materials Science*, vol. 27, no. 1, pp:14-24, 2011.

[4] J. Park, J. Eom and H. Kwon, "Fabrication of Sn–C composite electrodes by electrodeposition and their cycle performance for Li-ion batteries,"*Electrochemistry Communications*, vol. 11, no. 3, pp:596-598, 2009.

[5] M. Marcinek, L. J. Hardwick, T. J. Richardson, X. Song and R. Kostecki, "Microwave plasma chemical vapor deposition of nano-structured Sn/C composite thin-film anodes for Li-ion batteries,"*Journal of Power Sources*, vol. 173, no. 2, pp:965-971, 2007.

[6] B. Guo, J. Shu, K. Tang, Y. Bai, Z. Wang and L. Chen, "Nano-Sn/hard carbon composite anode material with high-initial coulombic efficiency,"*Journal of Power Sources*, vol. 177, no. 1, pp:205-210, 2008.

[7] Y. Yu, L. Gu, C. Wang, A. Dhanabalan, P. A. van Aken and J. Maier, "Encapsulation of Sn@carbon Nanoparticles in Bamboo-like Hollow Carbon Nanofibers as an Anode Material in Lithium-Based Batteries,"*Angewandte Chemie-International Edition*, vol. 48, no. 35, pp:6485-6489, 2009.

[8] G. Wang, B. Wang, X. Wang, J. Park, S. Dou, H. Ahn and K. Kim, "Sn/graphene nanocomposite with 3D architecture for enhanced reversible lithium storage in lithium ion batteries,"*Journal of Materials Chemistry*, vol. 19, no. 44, pp:8378-8384, 2009.

[9] B. Luo, B. Wang, X. Li, Y. Jia, M. Liang and L. Zhi, "Graphene-Confined Sn Nanosheets with Enhanced Lithium Storage Capability,"*Advanced Materials*, vol. 24, no. 26, pp:3538-3543, 2012.

[10] X. Li, A. Dhanabalan, L. Gu and C. Wang, "Three-Dimensional Porous Core-Shell Sn@Carbon Composite Anodes for High-Performance Lithium-Ion Battery Applications,"*Advanced Energy Materials*, vol. 2, no. 2, pp:238-244, 2012.

[11] Y. Yu, L. Gu, C. Zhu, P. A. van Aken and J. Maier, "Tin Nanoparticles Encapsulated in Porous Multichannel Carbon Microtubes: Preparation by Single-Nozzle Electrospinning and Application as Anode Material for High-Performance Li-Based Batteries,"*Journal of the American Chemical Society*, vol. 131, no. 44, pp:15984-+, 2009.

[12] Y. Xu, J. Guo and C. Wang, "Sponge-like porous carbon/tin composite anode materials for lithium ion batteries,"*Journal of Materials Chemistry*, vol. 22, no. 19, pp:9562-9567, 2012.

[13] M.-Y. Li, Y. Wang, C.-L. Liu, C. Zhang and W.-S. Dong, "Synthesis of Carbon/Tin Composite Anode Materials for Lithium-Ion Batteries,"*Journal of the Electrochemical Society*, vol. 159, no. 2, pp:A91-A97, 2012.
